# Supplementary material for: Vitamin D Metabolic Ratio and Risks of Death and CKD Progression
Source: PubMed Central journal article supplement — Kidney Int Rep. 2019 Aug 30;4(11):1598–607. doi: 10.1016/j.ekir.2019.08.014 (PMC6933450; doi:10.1016/j.ekir.2019.08.014), 2019-08-30

## SUPPLEMENTAL TABLES

**Supplemental Table 1. Cross-sectional associations of clinical characteristics with vitamin D metabolic ratio (24,25(OH)<sub>2</sub>D<sub>3</sub>/25(OH)D<sub>3</sub>)**

| Characteristic        | N   | Unadjusted ratio | Adjusted* mean difference    |          |
|-----------------------|-----|------------------|------------------------------|----------|
|                       |     | mean (SD)        | (95% CI)                     | p-values |
| <b>Age</b>            |     |                  |                              |          |
| <50 years             | 190 | 36.5 (21.4)      | 0 (reference)                |          |
| 50-<60 years          | 287 | 38.0 (19.6)      | 3.53 (0.41, 6.64) 0.026      |          |
| 60-<70 years          | 432 | 39.6 (19.8)      | 6.86 (3.92, 9.79) <0.001     |          |
| ≥70 years             | 171 | 34.1 (16.2)      | 4.54 (0.97, 8.12) 0.013      |          |
| Age (per 10 years)    |     |                  | 1.43 (0.45, 2.41) 0.004      |          |
| <b>Sex</b>            |     |                  |                              |          |
| Male                  | 616 | 37.9 (19.4)      | 0 (reference)                |          |
| Female                | 464 | 37.6 (19.9)      | -0.64 (-2.68, 1.41) 0.543    |          |
| <b>Race/ethnicity</b> |     |                  |                              |          |
| White                 | 463 | 43.6 (19.8)      | 0 (reference)                |          |
| Black                 | 457 | 32.7 (18.9)      | -8.41 (-10.58, -6.24) <0.001 |          |
| Hispanic              | 124 | 33.8 (15.6)      | -3.06 (-6.44, 0.32) 0.076    |          |
| Other                 | 36  | 41.1 (18.4)      | -1.56 (-7.20, 4.07) 0.587    |          |
| <b>Diabetes</b>       |     |                  |                              |          |
| No                    | 546 | 42.0 (21.3)      | 0 (reference)                |          |
| Yes                   | 534 | 33.5 (16.6)      | -6.04 (-8.11, -3.97) <0.001  |          |
| <b>Prevalent CVD</b>  |     |                  |                              |          |
| No                    | 718 | 38.9 (20.0)      | 0 (reference)                |          |
| Yes                   | 362 | 35.5 (18.5)      | -0.006 (-2.29, 2.27) 0.996   |          |
| <b>Active smoking</b> |     |                  |                              |          |
| No                    | 967 | 38.4 (19.7)      | 0 (reference)                |          |
| Yes                   | 113 | 32.1 (17.9)      | -5.99 (-9.28, -2.69) <0.001  |          |
| <b>Calciferol use</b> |     |                  |                              |          |
| No                    | 944 | 36.7 (19.1)      | 0 (reference)                |          |
| Yes                   | 132 | 44.9 (22.0)      | 6.86 (3.70, 10.02) <0.001    |          |

|                                                               |      |             |                         |        |
|---------------------------------------------------------------|------|-------------|-------------------------|--------|
| <b>Vitamin D Receptor Agonists use</b>                        |      |             |                         |        |
| No                                                            | 1007 | 38.5 (19.8) | 0 (reference)           |        |
| Yes                                                           | 69   | 26.9 (11.6) | -0.45 (-4.77, 3.88)     | 0.839  |
| <b>Cinacalcet use</b>                                         |      |             |                         |        |
| No                                                            | 1074 | 37.8 (19.6) | 0 (reference)           |        |
| Yes                                                           | 2    | 14.8 (4.2)  | -15.74 (-39.28, 7.80)   | 0.190  |
| <b>Phosphate binder use</b>                                   |      |             |                         |        |
| No                                                            | 1008 | 38.0 (19.4) | 0 (reference)           |        |
| Yes                                                           | 68   | 34.2 (21.8) | 0.88 (-3.35, 5.11)      | 0.684  |
| <b>Body mass index</b>                                        |      |             |                         |        |
| <30 kg/m <sup>2</sup>                                         | 477  | 41.5 (21.1) | 0 (reference)           |        |
| 30-<35 kg/m <sup>2</sup>                                      | 278  | 37.3 (17.4) | -3.47 (-5.98, -0.95)    | 0.007  |
| ≥35 kg/m <sup>2</sup>                                         | 319  | 32.7 (17.9) | -7.28 (-9.79, -4.78)    | <0.001 |
| Body mass index (per 5 kg/m <sup>2</sup> )                    |      |             | -2.05 (-2.71, -1.40)    | <0.001 |
| <b>Estimated GFR</b>                                          |      |             |                         |        |
| ≥60 mL/min/1.73m <sup>2</sup>                                 | 152  | 53.4 (21.7) | 0 (reference)           |        |
| 45-<60 mL/min/1.73m <sup>2</sup>                              | 307  | 43.4 (18.8) | -9.64 (-13.05, -6.23)   | <0.001 |
| 30-<45 mL/min/1.73m <sup>2</sup>                              | 377  | 34.8 (16.6) | -18.05 (-21.42, -14.68) | <0.001 |
| <30 mL/min/1.73m <sup>2</sup> **                              | 238  | 25.7 (13.5) | -26.60 (-30.21, -23.00) | <0.001 |
| Estimated GFR (per 15 decrease mL/min/1.73m <sup>2</sup> )*** |      |             | -8.53 (-9.54, -7.51)    | <0.001 |
| <b>Urine protein</b>                                          |      |             |                         |        |
| <30 mg/d                                                      | 682  | 40.4 (19.9) | 0 (reference)           |        |
| 30-<300 mg/d                                                  | 285  | 33.4 (18.3) | 1.85 (-0.81, 4.50)      | 0.172  |
| ≥300 mg/d                                                     | 35   | 29.7 (19.8) | 3.24 (-2.88, 9.37)      | 0.299  |
| Urine protein (per doubling)                                  |      |             | 0.22 (-0.33, 0.76)      | 0.434  |
| <b>PTH (per doubling)</b>                                     | 1076 |             | -6.16 (-7.25, -5.06)    | <0.001 |
| <b>FGF-23 (per doubling)</b>                                  | 1040 |             | -0.46 (-1.49, 0.57)     | 0.380  |

\*adjusted for age (continuous), sex, race/ethnicity (4 categories), diabetes (Y/N), and eGFR (continuous)

**Supplemental Table 2. Association of baseline clinical characteristics with change in vitamin D metabolic ratio (24,25(OH)<sub>2</sub>D<sub>3</sub>/25(OH)D<sub>3</sub>)**

| Characteristic                          | N   | Unadjusted absolute change** in ratio 24,25(OH) <sub>2</sub> D <sub>3</sub> /25(OH)D <sub>3</sub> (pg/ng) | Adjusted* difference in change (pg/ng) | p-values |
|-----------------------------------------|-----|-----------------------------------------------------------------------------------------------------------|----------------------------------------|----------|
|                                         |     | mean (SD)                                                                                                 | (95% CI)                               |          |
| <b>Age</b>                              |     |                                                                                                           |                                        |          |
| <50 years                               | 138 | -1.48 (15.62)                                                                                             | 0 (reference)                          |          |
| 50-<60 years                            | 214 | -0.58 (16.45)                                                                                             | 0.90 (-2.44, 4.24)                     | 0.596    |
| 60-<70 years                            | 311 | -1.60 (14.99)                                                                                             | 0.002 (-3.15, 3.15)                    | 0.999    |
| ≥70 years                               | 114 | -2.42 (14.77)                                                                                             | -0.77 (-4.70, 3.17)                    | 0.702    |
| Age (per 10 years)                      |     |                                                                                                           | -0.07 (-1.13, 1.00)                    | 0.905    |
| <b>Sex</b>                              |     |                                                                                                           |                                        |          |
| Male                                    | 432 | -1.71 (15.93)                                                                                             | 0 (reference)                          |          |
| Female                                  | 345 | -1.05 (14.89)                                                                                             | 0.68 (-1.53, 2.88)                     | 0.547    |
| <b>Race/ethnicity</b>                   |     |                                                                                                           |                                        |          |
| White                                   | 347 | -1.15 (15.54)                                                                                             | 0 (reference)                          |          |
| Black                                   | 319 | -1.33 (15.35)                                                                                             | -0.03 (-2.43, 2.38)                    | 0.981    |
| Hispanic                                | 88  | -3.65 (15.76)                                                                                             | -2.19 (-5.92, 1.54)                    | 0.249    |
| Other                                   | 23  | 1.87 (14.67)                                                                                              | 3.01 (-3.55, 9.57)                     | 0.368    |
| <b>Diabetes</b>                         |     |                                                                                                           |                                        |          |
| No                                      | 413 | -1.05 (16.39)                                                                                             | 0 (reference)                          |          |
| Yes                                     | 364 | -1.83 (14.36)                                                                                             | -0.64 (-2.87, 1.59)                    | 0.572    |
| <b>Prevalent cardiovascular disease</b> |     |                                                                                                           |                                        |          |
| No                                      | 530 | -1.29 (15.97)                                                                                             | 0 (reference)                          |          |
| Yes                                     | 247 | -1.69 (14.35)                                                                                             | -0.05 (-2.55, 2.44)                    | 0.967    |
| <b>Active smoking</b>                   |     |                                                                                                           |                                        |          |
| No                                      | 715 | -1.36 (15.51)                                                                                             | 0 (reference)                          |          |
| Yes                                     | 62  | -2.04 (15.12)                                                                                             | -0.74 (-4.80, 3.31)                    | 0.719    |
| <b>Calciferol use</b>                   |     |                                                                                                           |                                        |          |

|                                                               |     |               |                      |        |
|---------------------------------------------------------------|-----|---------------|----------------------|--------|
| No                                                            | 674 | -1.34 (15.34) | 0 (reference)        |        |
| Yes                                                           | 102 | -2.01 (16.40) | -0.96 (-4.30, 2.38)  | 0.574  |
| <b>Vitamin D receptor activator use</b>                       |     |               |                      |        |
| No                                                            | 731 | -1.55 (15.50) | 0 (reference)        |        |
| Yes                                                           | 45  | 0.61 (15.02)  | 3.07 (-1.85, 7.98)   | 0.221  |
| <b>Cinacalcet use</b>                                         |     |               |                      |        |
| No                                                            | 775 | -1.43 (15.47) | 0 (reference)        |        |
| Yes                                                           | 1   | 18.2          | 20.63 (-9.94, 51.20) | 0.186  |
| <b>Phosphate binder use</b>                                   |     |               |                      |        |
| No                                                            | 729 | -1.62 (15.40) | 0 (reference)        |        |
| Yes                                                           | 47  | 1.58 (16.53)  | 3.61 (-1.10, 8.31)   | 0.133  |
| <b>Body mass index</b>                                        |     |               |                      |        |
| <30 kg/m <sup>2</sup>                                         | 353 | -0.96 (16.59) | 0 (reference)        |        |
| 30-<35 kg/m <sup>2</sup>                                      | 197 | -1.45 (14.65) | -0.28 (-3.05, 2.49)  | 0.844  |
| ≥35 kg/m <sup>2</sup>                                         | 224 | -1.96 (14.33) | -0.83 (-3.60, 1.94)  | 0.558  |
| Body mass index (per 5 kg/m <sup>2</sup> )                    |     |               | 0.16 (-5.73, 0.90)   | 0.663  |
| <b>Estimated GFR</b>                                          |     |               |                      |        |
| ≥60 mL/min/1.73m <sup>2</sup>                                 | 118 | 0.42 (17.85)  | 0 (reference)        |        |
| 45-<60 mL/min/1.73m <sup>2</sup>                              | 244 | -0.57 (15.19) | -1.05 (-4.55, 2.45)  | 0.556  |
| 30-<45 mL/min/1.73m <sup>2</sup>                              | 258 | -3.26 (14.75) | -3.70 (-7.22, -0.17) | 0.040  |
| <30 mL/min/1.73m <sup>2</sup> **                              | 154 | -0.90 (15.04) | -1.31 (-5.14, 2.51)  | 0.500  |
| Estimated GFR (per 15 decrease mL/min/1.73m <sup>2</sup> )*** |     |               | -0.41 (-1.50, 0.68)  | 0.460  |
| <b>Urine protein</b>                                          |     |               |                      |        |
| <30 mg/d                                                      | 504 | -0.11 (15.01) | 0 (reference)        |        |
| 30-<300 mg/d                                                  | 195 | -4.66 (15.44) | -5.02 (-7.96, -2.07) | 0.001  |
| ≥300 mg/d                                                     | 22  | -1.66 (25.93) | -2.36 (-9.40, 4.67)  | 0.510  |
| Urine protein (per doubling)                                  |     |               | -1.08 (-1.68, -0.48) | <0.001 |
| <b>PTH (per doubling)</b>                                     | 757 |               | 1.54 (0.26, 2.81)    | 0.018  |
| <b>FGF-23 (per doubling)</b>                                  | 773 |               | 0.64 (-0.58, 1.85)   | 0.306  |

\*adjusted for age (continuous), sex, race/ethnicity (4 categories), diabetes (Y/N), and eGFR (continuous)

**Supplemental Table 3. Association of change in baseline clinical characteristics with change in vitamin D metabolic ratio (24,25(OH)<sub>2</sub>D<sub>3</sub>/25(OH)D<sub>3</sub>)**

| Characteristic              | N   | Unadjusted absolute change** in ratio 24,25(OH) <sub>2</sub> D <sub>3</sub> :25(OH)D <sub>3</sub> (pg/ng) mean (SD) | Adjusted difference in change in 24,25(OH) <sub>2</sub> D <sub>3</sub> :25(OH)D <sub>3</sub> (95% CI)* (pg/ng) | p-value |
|-----------------------------|-----|---------------------------------------------------------------------------------------------------------------------|----------------------------------------------------------------------------------------------------------------|---------|
| <b>Active smoking</b>       |     |                                                                                                                     |                                                                                                                |         |
| None at year 1 or 4         | 708 | -1.36 (15.57)                                                                                                       | 0 (reference)                                                                                                  |         |
| At year 1, but not year 4   | 14  | -1.93 (15.64)                                                                                                       | -0.62 (-8.86, 7.62)                                                                                            | 0.883   |
| At year 4, but not year 1   | 7   | 2.87 (9.19)                                                                                                         | 4.31 (-7.29, 15.92)                                                                                            | 0.466   |
| At year 1 and year 4        | 48  | -2.07 (15.13)                                                                                                       | -0.73 (-5.30, 3.85)                                                                                            | 0.755   |
| <b>Calciferol use</b>       |     |                                                                                                                     |                                                                                                                |         |
| None at year 1 or 4         | 534 | -2.85 (14.67)                                                                                                       | 0 (reference)                                                                                                  |         |
| At year 1, but not year 4   | 43  | -4.90 (11.86)                                                                                                       | -1.97 (-6.79, 2.85)                                                                                            | 0.424   |
| At year 4, but not year 1   | 133 | 5.52 (16.31)                                                                                                        | 8.45 (5.52, 11.39)                                                                                             | <0.001  |
| At year 1 and year 4        | 59  | 0.17 (18.90)                                                                                                        | 3.08 (-1.16, 7.32)                                                                                             | 0.154   |
| <b>VDRA use</b>             |     |                                                                                                                     |                                                                                                                |         |
| None at year 1 or 4         | 646 | -1.76 (15.65)                                                                                                       | 0 (reference)                                                                                                  |         |
| At year 1, but not year 4   | 23  | 0.73 (17.14)                                                                                                        | 4.29 (-2.49, 11.08)                                                                                            | 0.214   |
| At year 4, but not year 1   | 78  | 1.60 (14.34)                                                                                                        | 4.46 (0.62, 8.31)                                                                                              | 0.023   |
| At year 1 and year 4        | 22  | 0.48 (12.84)                                                                                                        | 3.57 (-3.18, 10.31)                                                                                            | 0.299   |
| <b>Phosphate binder use</b> |     |                                                                                                                     |                                                                                                                |         |
| None at year 1 or 4         | 675 | -1.26 (15.09)                                                                                                       | 0 (reference)                                                                                                  |         |
| At year 1, but not year 4   | 31  | 3.77 (15.42)                                                                                                        | 5.19 (-0.55, 10.94)                                                                                            | 0.076   |
| At year 4, but not year 1   | 47  | -4.64 (19.45)                                                                                                       | -3.07 (-7.73, 1.59)                                                                                            | 0.197   |
| At year 1 and year 4        | 16  | -1.85 (18.66)                                                                                                       | -0.58 (-8.37, 7.21)                                                                                            | 0.884   |

\* adjusted for age at year , sex, race/ethnicity (4 categories), diabetes at year 1 (Y/N), and eGFR at year 1 (continuous)

**Supplemental Table 4. Association of time-updated vitamin D metabolic ratio (24,25(OH)<sub>2</sub>D<sub>3</sub>/25(OH)D<sub>3</sub>) with risk of ESRD and death**

|                            | 24,25(OH) <sub>2</sub> D <sub>3</sub> /25(OH)D <sub>3</sub> Ratio |                   |            |                            |                      |
|----------------------------|-------------------------------------------------------------------|-------------------|------------|----------------------------|----------------------|
|                            | Tertiles                                                          |                   |            | Linear model               |                      |
|                            | 1                                                                 | 2                 | 3          | Per SD decrease = 20 units | p-value <sup>‡</sup> |
| <b>ESRD (case-cohort)</b>  |                                                                   |                   |            |                            |                      |
| Unadjusted                 | 5.82 (4.55, 7.44)                                                 | 2.63 (2.02, 3.41) | 1.00 (ref) | 2.26 (2.01, 2.54)          | <0.001               |
| model 1                    | 4.12 (2.58, 6.58)                                                 | 2.25 (1.42, 3.57) | 1.00 (ref) | 1.93 (1.54, 2.44)          | <0.001               |
| model 2                    | 0.98 (0.56, 1.72)                                                 | 1.03 (0.58, 1.86) | 1.00 (ref) | 0.88 (0.69, 1.13)          | 0.327                |
| model 3                    | 0.74 (0.43, 1.30)                                                 | 0.81 (0.45, 1.45) | 1.00 (ref) | 0.75 (0.58, 0.97)          | 0.031                |
| <b>Death (case-cohort)</b> |                                                                   |                   |            |                            |                      |
| Unadjusted                 | 1.81 (1.45, 2.26)                                                 | 1.61 (1.27, 2.03) | 1.00 (ref) | 1.36 (1.23, 1.51)          | <0.001               |
| model 1                    | 1.72 (1.20, 2.47)                                                 | 1.44 (1.01, 2.07) | 1.00 (ref) | 1.28 (1.08, 1.51)          | 0.004                |
| model 2                    | 1.33 (0.88, 2.03)                                                 | 1.32 (0.89, 1.95) | 1.00 (ref) | 1.16 (0.96, 1.41)          | 0.118                |
| model 3                    | 1.21 (0.77, 1.92)                                                 | 1.45 (0.95, 2.19) | 1.00 (ref) | 1.07 (0.87, 1.31)          | 0.515                |

Model 1: Adjusted for age, gender, race, diabetes, systolic blood pressure, number of anti-hypertensive medication classes, prevalent cardiovascular disease, smoking status, RAAS inhibitors, statin use, calciferol use, and Vit D receptor activators

Model 2: Model 1 + eGFR and PCR

Model 3: Model 2 + PTH and FGF23

**Supplemental Table 5. Associations of 24,25(OH)<sub>2</sub>D<sub>3</sub> with risk of ESRD and death in case-cohort**

| 24,25(OH) <sub>2</sub> D <sub>3</sub> | N events | Incidence rate (%/yr)* | HR (95% CI)       | HR (95% CI)       | HR (95% CI)       |
|---------------------------------------|----------|------------------------|-------------------|-------------------|-------------------|
|                                       |          |                        | Model 1           | Model 2           | Model 3           |
| <b>ESRD</b>                           |          |                        |                   |                   |                   |
| <b>Tertile 1</b>                      | 416      | 7.85                   | 3.83 (2.86, 5.12) | 1.42 (0.97, 2.07) | 1.29 (0.83, 2.02) |
| <b>Tertile 2</b>                      | 198      | 3.59                   | 1.79 (1.34, 2.41) | 1.13 (0.78, 1.62) | 1.02 (0.68, 1.53) |
| <b>Tertile 3</b>                      | 94       | 1.36                   | ref               | ref               | ref               |
| <b>Per 20 pg/ng (1 SD) decrement</b>  |          |                        | 1.92 (1.64, 2.25) | 1.17 (1.00, 1.36) | 1.12 (0.94, 1.33) |
| <b>Death</b>                          |          |                        |                   |                   |                   |
| <b>Tertile 1</b>                      | 327      | 5.18                   | 2.08 (1.55, 2.78) | 1.58 (1.14, 2.21) | 1.64 (1.10, 2.45) |
| <b>Tertile 2</b>                      | 203      | 2.84                   | 1.50 (1.13, 1.99) | 1.44 (1.06, 1.94) | 1.46 (1.03, 2.05) |
| <b>Tertile 3</b>                      | 120      | 1.45                   | ref               | ref               | ref               |
| <b>Per 20 pg/ng (1 SD) decrement</b>  |          |                        | 1.40 (1.22, 1.61) | 1.27 (1.10, 1.45) | 1.29 (1.09, 1.53) |

Model 1: Adjusted for age, gender, race, diabetes, systolic blood pressure, number of anti-hypertensive medication classes, prevalent cardiovascular disease, smoking status, RAAS inhibitors, statin use, calciferol use, and Vit D receptor activators

Model 2: Model 1 + eGFR and PCR

Model 3: Model 2 + PTH and FGF23

Supplemental Figure 1. Scatterplots of 24,25(OH)2D3/ 24(OH)D3 with (a) eGFR and (b) urine PCR

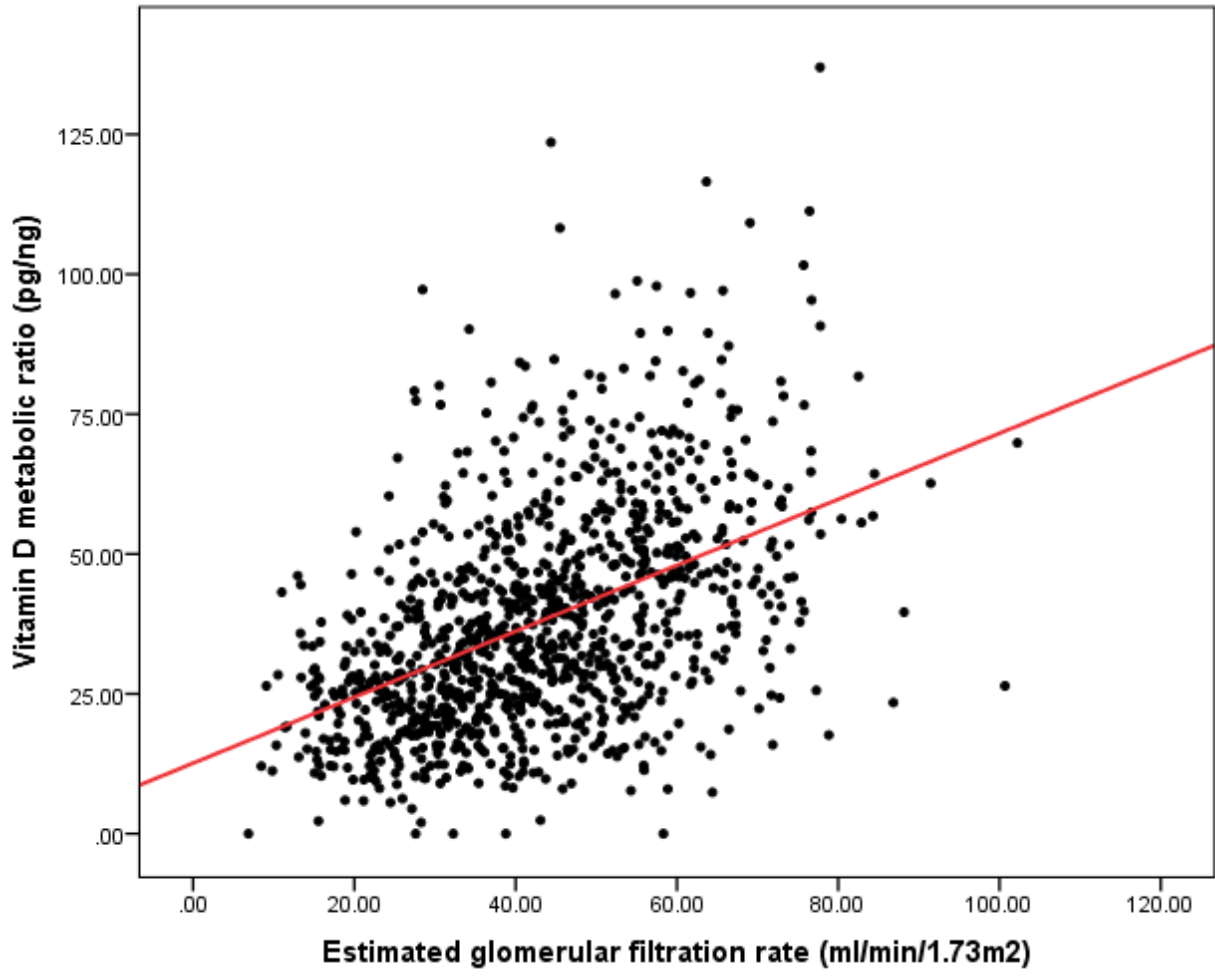



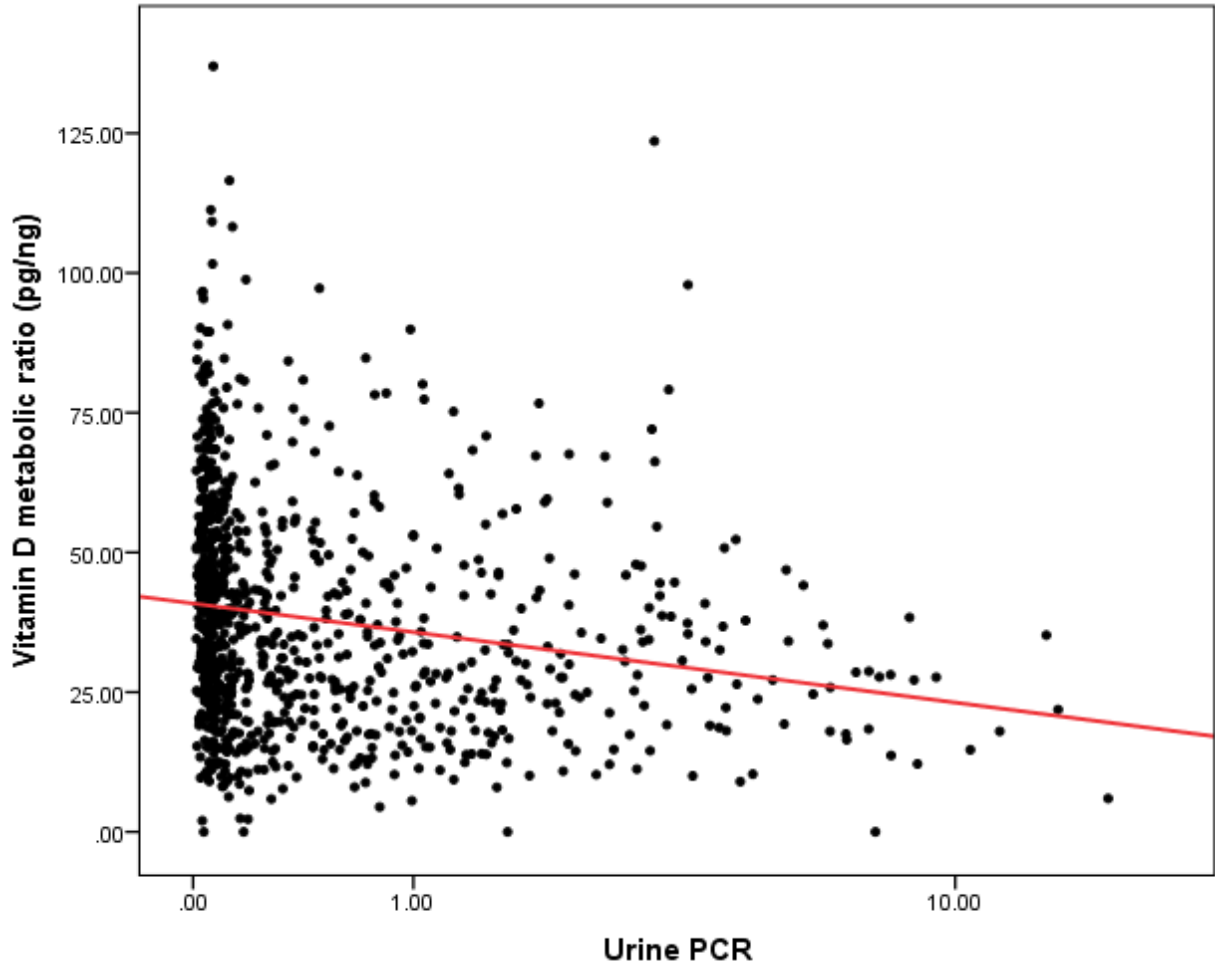

**Supplemental Figure 2. Histogram of change in vitamin D metabolic ratio ( $24,25(\text{OH})_2\text{D}_3/25(\text{OH})\text{D}_3$ ) from Year 1 to Year 4**

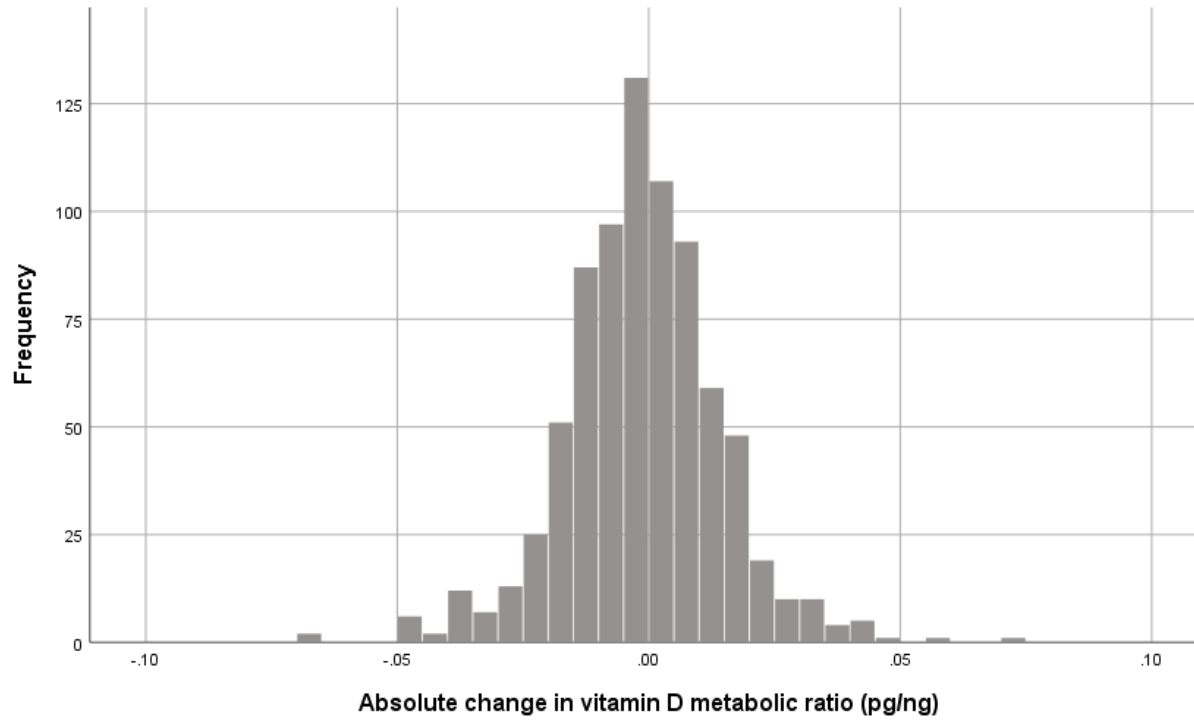

Supplement: mmc1.pdf [file mmc1.pdf]
